1 **Genetic landscape of recessive diseases in the Vietnamese population**  
2 **from large-scale clinical exome sequencing**

3 Ngoc Hieu Tran<sup>1</sup>, Thanh-Huong Nguyen Thi<sup>2</sup>, Hung-Sang Tang<sup>1,3</sup>, Le-Phuc Hoang<sup>2</sup>, Trung-Hieu  
4 Le Nguyen<sup>4,9</sup>, Nhat-Thang Tran<sup>5</sup>, Thu-Huong Nhat Trinh<sup>6</sup>, Van Thong Nguyen<sup>7</sup>, Bao-Han Huu  
5 Nguyen<sup>2</sup>, Hieu Trong Nguyen<sup>1</sup>, Loc Phuoc Doan<sup>1</sup>, Ngoc-Minh Phan<sup>1,3</sup>, Kim-Huong Thi  
6 Nguyen<sup>1,3</sup>, Hong-Dang Luu Nguyen<sup>1,3</sup>, Minh-Tam Thi Quach<sup>1,3</sup>, Thanh-Phuong Thi Nguyen<sup>1,3</sup>,  
7 Vu Uyen Tran<sup>1</sup>, Dinh-Vinh Tran<sup>8</sup>, Quynh-Tho Thi Nguyen<sup>3</sup>, Thanh-Thuy Thi Do<sup>3</sup>, Nien Vinh  
8 Lam<sup>9</sup>, Phuong Cao Thi Ngoc<sup>1</sup>, Dinh Kiet Truong<sup>3</sup>, Hoai-Nghia Nguyen<sup>9,\*</sup>, Minh-Duy Phan<sup>1,\*</sup>,  
9 Hoa Giang<sup>1,3,\*</sup>

10

11 <sup>1</sup>Gene Solutions, Ho Chi Minh city, Vietnam

12 <sup>2</sup>Children Hospital 1, Ho Chi Minh city, Vietnam

13 <sup>3</sup>Medical Genetics Institute, Ho Chi Minh city, Vietnam

14 <sup>4</sup>Department of Neurology, Children Hospital 2, Ho Chi Minh city, Vietnam

15 <sup>5</sup>University Medical Center, Ho Chi Minh city, Vietnam

16 <sup>6</sup>Tu Du Hospital, Vietnam

17 <sup>7</sup>Hung Vuong Hospital, Vietnam

18 <sup>8</sup>Da Nang Hospital for Women and Children, Vietnam

19 <sup>9</sup>University of Medicine and Pharmacy at Ho Chi Minh city, Vietnam

20

21 \*Corresponding authors.

22 Hoai-Nghia Nguyen (nhnghia81@gmail.com)

23 Minh-Duy Phan (pmduy@yahoo.com); [ORCID: 0000-0002-3426-1044](https://orcid.org/0000-0002-3426-1044)

24 Hoa Giang (gianghoa@gmail.com)

25 **Abstract**

26 **Purpose:** Accurate profiling of population-specific recessive diseases is essential for the design  
27 of cost-effective carrier screening programs. However, minority populations and ethnic groups,  
28 including Vietnamese, are still under-represented in existing genetic studies. Here we reported  
29 the first comprehensive study of recessive diseases in the Vietnamese population.

30 **Methods:** Clinical exome sequencing (CES) data of 4,503 disease-associated genes obtained  
31 from a cohort of 985 Vietnamese individuals was analyzed to identify pathogenic variants,  
32 associated diseases and their carrier frequencies in the population.

33 **Results:** Eighty-five recessive diseases were identified in the Vietnamese population, among  
34 which seventeen diseases had carrier frequencies of at least 1% (1 in 100 individuals). Three  
35 diseases were especially prevalent in the Vietnamese population with carrier frequencies of 2-  
36 12 times higher than in other East Asia or the world populations, including Beta-thalassemia (1  
37 in 25), citrin deficiency (1 in 33) and phenylketonuria (1 in 40). Seven novel pathogenic and  
38 three likely pathogenic variants associated with nine recessive diseases were also discovered.

39 **Conclusions:** The comprehensive profile of recessive diseases identified in this study shall  
40 enable the design of cost-effective carrier screening programs specific to the Vietnamese  
41 population. The newly discovered pathogenic variants may also exist in other populations at  
42 extremely low frequencies, thus representing a valuable resource for future research. Our study  
43 has demonstrated the advantage of population-specific genetic studies to advance the  
44 knowledge and practice of medical genetics.

45 **Keywords:** carrier frequency; carrier screening; recessive diseases.

## 46 INTRODUCTION

47 As high-throughput sequencing technologies are getting more popular and affordable, carrier  
48 screening has become a routine, essential tool for preventive healthcare and offers a great  
49 resource of information to guide public health policies [1-3]. Individuals identified as carriers of  
50 pathogenic genes and associated disorders may take preventive steps to reduce the risk of  
51 having their offspring inherit these disorders, such as preimplantation genetic diagnosis of  
52 embryos and/or early prenatal genetic testing. In addition, newborn screening programs enable  
53 early diagnosis and effective treatment of affected children, which not only significantly improve  
54 the outcomes but also reduce the treatment costs and efforts.

55 However, there are more than a thousand of Mendelian inherited disorders that have been  
56 documented, according to the Online Mendelian Inheritance in Man (OMIM) database [4]. Most  
57 of the diseases are rare and their prevalence depends heavily on specific populations and  
58 ethnicities. Thus, accurate profiling of population- or ethnicity-specific inherited diseases is  
59 essential for the design of cost-effective and comprehensive carrier screening programs. For  
60 example, cystic fibrosis is recommended for carrier screening for individuals of Caucasian or  
61 Ashkenazi Jewish ancestry, Tay–Sachs disease for individuals of Ashkenazi Jewish ancestry,  
62 and Beta-thalassemia for individuals from Mediterranean regions [1]. The critical problem,  
63 however, is the under-representation of minority populations and ethnic groups in existing  
64 genetic studies and databases [5-7]. Gurdasani *et al.* found that nearly 78% of the participants  
65 in genetic studies had European ancestries, whereas the two major populations, Asian and  
66 African, only accounted for 11% and 2.4%, respectively [6]. Indeed, genetic research on the  
67 Vietnamese population still lags behind other Western and Asian populations, despite recent  
68 efforts of genome sequencing projects in the country [8, 9]. There has been no research to  
69 study the prevalence of inherited disorders in the Vietnamese population. Even for well-known  
70 diseases in the population such as non-syndromic hearing loss and deafness or Beta-

71 thalassemia, their exact carrier frequencies and associated pathogenic variants are still  
72 unknown. Carrier screening in Vietnam is still in its infancy.

73 In this study, we reported the first comprehensive profile of 85 recessive diseases and their  
74 prevalence in the Vietnamese population. The study was performed on the clinical exome  
75 sequencing data of 4,503 genes obtained from a cohort of 985 Vietnamese individuals. We  
76 analyzed the genetic variants obtained from these individuals and identified all pathogenic  
77 variants, genes, associated diseases, and their carrier frequencies in the Vietnamese  
78 population. We also compared the results to other populations and highlighted three diseases  
79 that were found to be specific to the Vietnamese population. Finally, we identified seven novel  
80 pathogenic and three likely pathogenic variants and discussed how they might cause severe  
81 damages in nine associated diseases. Our study made an important step to advance the  
82 practice of medical genetics in Vietnam by providing the first inclusive picture of recessive  
83 diseases in the population and facilitating the development of carrier screening programs in the  
84 country.

## 85 **MATERIALS AND METHODS**

### 86 **Recruitment of study participants**

87 In this study, 985 individuals were recruited from 51 hospitals and clinics across Vietnam. The  
88 participants have approved and given written informed consent to the anonymous re-use of their  
89 genomic data for this study. The data was de-identified and aggregated for genetic analysis of  
90 the Vietnamese population. The study was approved by the institutional ethics committee of the  
91 University of Medicine and Pharmacy, Ho Chi Minh city, Vietnam

### 92 **Gene panel**

93 Targeted exome sequencing with a panel of 4,503 clinically relevant genes was performed to  
94 study inherited diseases in the Vietnamese population. The full list of genes is provided in  
95 Supplementary Table S1.

### 96 **Clinical exome sequencing**

97 Libraries were prepared from 2 ng of DNA using the NEBNext Ultra II FS DNA library prep kit  
98 (New England Biolabs, USA) following the manufacturer's instructions. Subsequently, libraries  
99 were pooled prior to hybridization with the xGen Lockdown probes for 4,503 targeted genes  
100 (Integrated DNA Technologies, USA). Exome sequencing was performed using NextSeq  
101 500/550 High output kits v2 (150 cycles) on Illumina NextSeq 550 system (Illumina, USA) with  
102 the coverage of 100x

### 103 **Variant calling and analysis**

104 Quality control and alignment of sequencing data to the human reference genome (build  
105 GRCh38) was performed following an established analysis workflow with FastQC [10],  
106 trimmomatic [11], bwa [12], samtools [13], and bedtools [14]. Variant calling was performed  
107 using GATK 3.8, followed by standard filters of quality and sequencing coverage [15]. We also  
108 filtered out variants with allele frequencies less than 0.1% and variants that were located outside  
109 of the target regions of our gene panel. The final variant call set was annotated against dbSNP  
110 (version 151, [16]) and ClinVar (version 20191231, [17]) databases, and was analyzed for their  
111 potential consequences using VEP [18]. Principal component analysis was performed using  
112 PLINK (version 1.9, [19]).

## 113 **RESULTS**

### 114 **Study cohort**

115 The cohort in our study included 985 participants who were recruited from 51 hospitals and  
116 clinics across Vietnam. The ages and types of samples of the participants are summarized in  
117 Table 1. The average age was 23.8 weeks gestational for fetuses, 4.4 years for children (54%  
118 male, 46% female), and 39.5 years for adults (43% male, 57% female). Among types of  
119 samples, most were blood (65.7%), followed by amniotic fluid (18.3%), buccal swab (12.1%),  
120 placental (1.32%), umbilical cord (0.8%) and others (1.83%).

### 121 **Summary of genetic variants in the study cohort**

122 The aggregated variant call set from 985 individuals, denoted as G4500, consisted of 67,140  
123 variants, including 61,327 SNPs (91.3%) and 5,813 indels (8.7%). Figures 1a-c show the  
124 comparison of the G4500 call set to that of the KHV population (Kinh in Ho Chi Minh City,  
125 Vietnam) from the 1000 genomes project [7] and the dbSNP database (for this comparison, we  
126 only considered variants located within the target regions of our gene panel). We found that  
127 27,655 variants (41.2%) of the G4500 call set had been reported earlier in the KHV call set  
128 (Figure 1a), and their allele frequencies were consistent between the two call sets with a strong  
129 Pearson correlation of 99.0% (Figure 1c). We also noted that the G4500 call set missed 8,634  
130 KHV variants, and further investigation showed that most (91.7%) of those variants were rare,  
131 appearing only in one single allele in the KHV population. The G4500 call set included 39,485  
132 variants (58.8%) that had not been reported in the KHV call set. Among them, 30,681 (45.7%)  
133 were found in the dbSNP database and the remaining 8,804 (13.1%) were novel. Most of the  
134 novel variants had allele frequencies less than 5% (Figure 1b).

135 We also performed principal component analysis (PCA) on the G4500 population and other  
136 East Asia populations from the 1000 Genome Project (JPT: Japanese in Tokyo, Japan; CHB:  
137 Han Chinese in Beijing, China; CHS: Southern Han Chinese; CDX: Chinese Dai in  
138 Xishuangbanna, China; KHV: Kinh in Ho Chi Minh City, Vietnam). Overall, Figure 1d shows that  
139 the PCA clustering of the populations was consistent with their respective geographic locations.

140 The G4500 and KHV populations closely clustered together as both represented the  
141 Vietnamese population. They were also located closer to the CDX population than to the CHS,  
142 CHB, and JPT populations, agreeing with the respective geographical distances.

143 We then used Variant Effect Predictor (VEP [18]) to predict potential effects of variants in the  
144 G4500 call set (Figure 1e). Majority of them were missense variants (45.1%), followed by  
145 synonymous variants (29.0%), and intron or splice region variants (16.7%). Notably, 4.5% of the  
146 variants were predicted to have high-impact consequences, including stop-gained, stop-lost,  
147 start-lost, frameshift, splice receptor and splice donor. Those high-impact variants may lead to  
148 protein truncation and are critical for clinical interpretation, as we shall show in the next  
149 sections.

#### 150 **Carrier frequencies of genetic diseases in the Vietnamese population**

151 We annotated the G4500 variant call set against the ClinVar database to identify pathogenic  
152 variants, genes, associated diseases, and estimated their carrier frequencies in the Vietnamese  
153 population. We found 21,151 variants with ClinVar annotations, and among them, 158 variants  
154 had been reviewed as “Pathogenic” or “Likely pathogenic”. These 158 variants were located on  
155 116 genes: 84 genes were associated with autosomal recessive (AR) diseases, 18 genes with  
156 autosomal dominant (AD) diseases, 9 genes with both AD and AR diseases, one gene with X-  
157 linked dominant disease (XLD) and one gene with X-linked recessive disease (XLR). In this  
158 study, we focused on 114 pathogenic variants on 85 genes that were associated with recessive  
159 diseases (84 AR and one XLR).

160 Twenty-three individuals in our cohort were identified as homozygous or compound  
161 heterozygous carriers for 5 genes associated with recessive diseases, including *GJB2* (n=12),  
162 *HFE* (n=5), *VPS13B* (n=4), *CBS* (n=1), and *GBA* (n=1) (Supplementary Table S2). Since our  
163 cohort data was obtained from pre-existing hospital records rather than a randomized study

164 design, we took a conservative approach and excluded these 23 individuals before calculating  
165 the carrier frequencies of the respective genes and diseases. Overall, the carrier frequencies  
166 were reduced by 0.1%-1% by this exclusion (Supplementary Table S3).

167 Figure 2 shows a summary of 114 pathogenic variants on 85 genes and associated recessive  
168 diseases identified from our G4500 dataset. The complete details are provided in  
169 Supplementary Table S4. As shown in Figure 2a, majority (54%) of these variants were protein-  
170 truncating (including stop gained, frameshift, splice acceptor or donor), followed by missense  
171 variants (41%). While most of the 85 genes only had one pathogenic variant, 20 of them  
172 (23.5%) had at least two pathogenic variants per gene (Figure 2b), such as *GAA* (5 variants),  
173 *GJB2* and *HBB* (3 variants each), *VPS13B* (2 variants), etc (Supplementary Table S4). By  
174 taking into account all pathogenic variants of each gene, our study provided more accurate  
175 estimates of disease carrier frequencies than a targeted genotyping approach that only focused  
176 on major variants [2]. The carrier frequency distribution is presented in Figure 2c. 17/85 genes  
177 (20%) were estimated to have carrier frequencies of more than 1% (1 in 100), among which  
178 seven diseases appeared in more than 2% (1 in 50), including three appeared in more than 5%  
179 (1 in 20) of the Vietnamese population.

180 Figure 2d shows the top seven genes and associated recessive diseases with carrier  
181 frequencies of more than 2% (1 in 50) in the Vietnamese population. Deafness, autosomal  
182 recessive 1A associated with gene *GJB2* was the most prevalent disorder with a carrier  
183 frequency of 17.2% (1 in 6). The prevalence of *GJB2*, in particular, the SNP rs72474224 C>T, in  
184 the Vietnamese population and other East Asian populations, as compared to Western  
185 populations, had been reported previously in [9]. Two other autosomal recessive diseases were  
186 found with relatively high carrier frequencies, including hemochromatosis type 1 (*HFE*, 9.4% or  
187 1 in 11) and Cohen syndrome (*VPS13B*, 8.1% or 1 in 12). Hemochromatosis type 1 is a  
188 metabolic disorder that causes the body to absorb too much iron (iron overload). Cohen



189 syndrome is a multisystem disorder characterized by many clinical features, including  
190 developmental delay, intellectual disability and facial dysmorphism. Both diseases are common  
191 genetic disorders among Western populations, but we found that they appeared less frequently  
192 in the Vietnamese population (Table 2). We also observed three other disorders that are among  
193 the most commonly encountered diseases by local medical doctors in Vietnam, including Beta-  
194 thalassemia (*HBB*, 4% or 1 in 25), citrin deficiency (*SLC25A13*, 3% or 1 in 33), and  
195 phenylketonuria (*PAH*, 2.5% or 1 in 40).

### 196 **Beta-thalassemia, Citrin Deficiency, and Phenylketonuria**

197 We further compared the allele frequencies of pathogenic variants of the top seven diseases-  
198 genes between the Vietnamese, the East Asia, and the global populations (gnomAD [20]).  
199 Figure 2e and Table 2 show that several pathogenic variants appeared 2-12 times more  
200 frequent in the Vietnamese population, especially for three diseases Beta-thalassemia, citrin  
201 deficiency and phenylketonuria. Beta-thalassemia is a blood disorder that reduces the  
202 production of hemoglobin; its major type can lead to severe or life-threatening outcomes and  
203 requires frequent blood transfusions for red blood cell supply. The prevalence and severe  
204 consequences of Beta-thalassemia is well-known among the Vietnamese population, yet no  
205 research has been done to study its genetic patterns in the population. Here we found that the  
206 allele frequency of the SNP rs33950507 C>T in gene *HBB* was 12 times higher in the  
207 Vietnamese population than in the East Asia population (1.57% and 0.13%, respectively).  
208 Furthermore, rs33950507 and two other pathogenic variants in gene *HBB* collectively  
209 contributed to a carrier frequency of 4% (1 in 25) for Beta-thalassemia in the Vietnamese  
210 population. The global carrier frequency of Beta-thalassemia had been estimated previously as  
211 0.7% (1 in 143), i.e. 5.7 times lower than in the Vietnamese population [2].

212 Another two SNPs, rs192592111 C>A and rs199475650 G>T, in gene *PAH* and associated with  
213 phenylketonuria were also found to have allele frequencies 9 times higher in the Vietnamese

214 population than in the East Asia population (Figure 2e, Table 2). Phenylketonuria is a metabolic  
215 disorder that causes phenylalanine to build up in the body, and if not treated, may lead to  
216 intellectual disability and other serious health problems. This disease is a very rare genetic  
217 condition in the world with a carrier frequency of 0.7%, mostly observed in Southern Europe or  
218 Hispanic, but not among the East Asia population [2]. However, we found two of its variants and  
219 estimated that its carrier frequency was 2.5% (1 in 40) in the Vietnamese population.

220 Similarly, we found two SNPs rs80338720 and rs80338725 in gene *SLC25A13* that were  
221 associated with citrin deficiency, and their respective allele frequencies were 2.4 times and 1.6  
222 times higher in the Vietnamese population than in the East Asia population. The total carrier  
223 frequency of citrin deficiency was estimated as 3% (1 in 33) in the Vietnamese population,  
224 which was in line with recent results for South East Asian populations in Singapore [3]. Citrin  
225 deficiency is a metabolic disorder that manifests in newborns as neonatal intrahepatic  
226 cholestasis or in adulthood as recurrent hyperammonemia with neuropsychiatric symptoms in  
227 citrullinemia type II. Without appropriate treatment, severe liver problems may develop and  
228 require liver transplantation.

229 In addition to the top seven genes with carrier frequencies of more than 2% (1 in 50), ten other  
230 genes had carrier frequencies of at least 1% (1 in 100), and the remaining 68 genes had carrier  
231 frequencies of less than 1% in the Vietnamese population. The complete profile of pathogenic  
232 variants, genes, recessive diseases, and their frequencies in the Vietnamese population is  
233 provided in Supplementary Table S4. Some other examples of high carrier frequencies include  
234 Pompe disease (*GAA*, 1.9% or 1 in 52), Zellweger syndrome (*PEX1*, 1.6% or 1 in 62), Stargardt  
235 disease (*ABCA4*, 1.3% or 1 in 76), Krabbe disease (*GALC*, 1.3% or 1 in 76), Bestrophinopathy,  
236 autosomal recessive (*BEST1*, 1.1% or 1 in 90), and Wilson disease (*ATP7B*, 0.9% or 1 in 110).

237 **Identifying new pathogenic variants for the Vietnamese population**

238 We next attempted to identify new pathogenic variants for the Vietnamese population from the  
239 G4500 call set. We focused on the variants that were predicted by VEP to have high-impact  
240 consequences but had not been reported in ClinVar. We identified 131 variants that may cause  
241 protein truncation, including stop-gained, stop-lost, start-lost, frameshift, and splice receptor or  
242 donor disruptions. Their distribution is presented in Figure 3a. We then manually reviewed these  
243 variants according to the American College of Medical Genetics (ACMG) classification  
244 guidelines [21] and classified seven of them as “Pathogenic” and three as “Likely pathogenic”  
245 variants. Their details are presented in Figure 3b and Supplementary Table S5.

246 The seven new pathogenic variants include four stop-gained and three frameshift variants that  
247 are rare or not present in public databases. In particular, four of them were found in gnomAD  
248 with global allele frequencies  $\leq 0.1\%$  and three of them were only found in our G4500 dataset.  
249 Their allele frequencies in the Vietnamese population were several times higher than in the East  
250 Asia and the world populations. For instance, the SNP rs185805779 G>A had allele frequencies  
251 of 1.52%, 0.17%, and 0.03% in the Vietnamese, the East Asia, and the global populations,  
252 respectively (Figure 3b). This stop-gained variant in gene *GCNT2* leads to a premature  
253 termination codon p.Trp5Ter at the beginning of the protein NP\_663624.1 and disrupts this  
254 whole protein. Similar nonsense, loss-of-function variants in gene *GCNT2* had been reported as  
255 pathogenic and associated with the cataract 13 with adult i phenotype, an autosomal recessive  
256 disorder of i and I antigens in blood that may lead to congenital cataract (OMIM 600429). Thus,  
257 we classified this variant as pathogenic (evidence categories PVS1, PM2 and PM4 in ACMG  
258 guidelines).

259 Notably, we identified three novel pathogenic variants that had never been reported before in  
260 any databases. In particular, the SNP chr8:93755784 C>A in gene *TMEM67* is a stop-gained  
261 variant that causes a premature termination codon p.Ser77Ter on the protein NP\_714915.3.  
262 Two other stop-gained, loss-of-function variants on this gene and its protein had been reported

263 in ClinVar as pathogenic, including ClinVar 506012 (NP\_714915.3:p.Arg172Ter) and ClinVar  
264 1376 (NP\_714915.3:p.Arg208Ter). Note that the mutated amino acid of the new SNP is located  
265 at position 77 and hence results in a shorter truncated protein than the other two mutations,  
266 causing even more severe damages. We classified this new SNP as pathogenic for *TMEM67*-  
267 associated Joubert syndrome (OMIM 609884).

268 Another novel stop-gained variant that we classified as pathogenic was the SNP chr4:78448244  
269 A>T in gene *FRAS1*, which causes a premature termination codon p.Lys2068Ter on the protein  
270 NP\_079350.5. Note that a missense variant, rs1578330963 A>G, had been reported at the  
271 same location in dbSNP for the Korean population [22]. Two other stop-gained, loss-of-function  
272 variants in *FRAS1* and NP\_079350.5 had been reported in ClinVar as pathogenic, including  
273 ClinVar 197861 (NP\_079350.5:p.Arg124Ter) and ClinVar 435260 (NP\_079350.5:p.Gln907Ter).  
274 Thus, we classified the new SNP as pathogenic for *FRAS1*-associated Fraser syndrome 1  
275 (OMIM 607830). Fraser syndrome is a rare genetic disorder characterized by cryptophthalmos,  
276 cutaneous syndactyly, and abnormalities of the genitalia and the urinary tract.

277 Similarly, we classified a novel deletion variant, chr6:152293724 TAGAG>T, as pathogenic for  
278 *SYNE1*-associated Spinocerebellar ataxia-8. This variant causes a frameshift p.Leu5887fs on  
279 the protein NP\_149062.2, for which several loss-of-function frameshift variants had been  
280 reported as pathogenic (ClinVar IDs 204299, 436905, 199228). Spinocerebellar ataxia-8 is a  
281 slowly progressive neurodegenerative disorder characterized by gait ataxia and other cerebellar  
282 signs, such as nystagmus and dysarthria (OMIM 608441).

283 Last but not least, we classified three new splice acceptor or donor variants as likely pathogenic  
284 (Supplementary Table S5). These variants were predicted to disrupt mRNA splicing and result  
285 in an absent or disrupted protein product. They were not found or appeared at less than 0.01%  
286 frequency in gnomAD. Similar splice acceptor or donor variants on the same genes had been  
287 reported as pathogenic or likely pathogenic. For instance, the SNP rs1183832067 A>C is a

288 splice donor in gene *RFX5*, and we found that its corresponding splice acceptor rs748270285  
289 G>A for the same exon 6 of transcript NM\_001025603.2 had been reported as pathogenic for  
290 Bare lymphocyte syndrome, type II, complementation group c (ClinVar 7646). Since more data  
291 is needed to establish the pathogenicity, we classified the three splice acceptor or donor  
292 variants in Supplementary Table S5 as likely pathogenic (evidence categories PVS1 and PM2 in  
293 ACMG guidelines).

## 294 **DISCUSSION**

295 In this paper, we analyzed the clinical exome sequencing data of 4,503 genes obtained from a  
296 cohort of 985 individuals to study recessive diseases in the Vietnamese population. We  
297 identified a comprehensive variant call set named G4500 that includes 61,327 SNPs and 5,813  
298 indels. We showed that the G4500 variant call set accurately represented the genetic  
299 characteristics of the Vietnamese population and also demonstrated how they are related to  
300 other East Asia populations.

301 Most importantly, our work is the first study that provided a comprehensive picture of 85 most  
302 common recessive diseases and their prevalence in the Vietnamese population. Among them,  
303 seven diseases had carrier frequencies of more than 2% (1 in 50) and ten diseases had carrier  
304 frequencies of at least 1% (1 in 100). For each disease, we provided complete details of its  
305 pathogenic variants, gene, and carrier frequency in the Vietnamese population as compared to  
306 other populations. For instance, *GJB2*-associated deafness autosomal recessive was the most  
307 prevalent disorder with a carrier frequency of 17.2% and consisted of three pathogenic variants.  
308 Notably, we found three diseases that were specific to the Vietnamese population with carrier  
309 frequencies of several times higher than in other East Asia or the world populations, including  
310 Beta-thalassemia (*HBB*, 4% or 1 in 25), citrin deficiency (*SLC25A13*, 3% or 1 in 33), and  
311 phenylketonuria (PAH, 2.5% or 1 in 40).

312 We also discovered seven new pathogenic and three new likely pathogenic variants that had  
313 not been reported in ClinVar. These new variants were associated with nine autosomal  
314 recessive diseases in autoimmune, hematology, ophthalmology, and neurology. Notably, two  
315 new pathogenic variants revealed much higher carrier frequencies of *TMEM67*-associated  
316 Joubert syndrome and *GCNT2*-associated cataract 13 with adult i phenotype in the Vietnamese  
317 population (2.64% and 3.04%, respectively) than previously estimated. Some of these variants  
318 and diseases might also appear in other populations at extremely low frequencies, e.g. *GCNT2*-  
319 associated cataract 13 with adult i phenotype and *RP1L1*-associated retinitis pigmentosa, thus  
320 representing a great resource for further studies. We also discussed how these new variants  
321 were related to previously reported pathogenic variants on the corresponding genes and  
322 proteins.

323 One limitation of this study was that our cohort was sampled from pre-existing hospital records  
324 rather than a randomized study design. To remove potential bias in our estimation of allele and  
325 carrier frequencies due to this type of sampling, we took a conservative approach by  
326 considering only recessive diseases and excluding 23 individuals identified as homozygous or  
327 compound heterozygous carriers for 5 genes. Thus, our estimated carrier frequencies for these  
328 5 genes and diseases may be considered as lower bounds. A more properly designed study  
329 with sufficiently large dataset could offer a more accurate representative of the Vietnamese  
330 population.

331 In conclusion, our study has significantly improved the knowledgebase and the practice of  
332 medical genetics in Vietnam in many aspects. Our findings offer a great resource to inform local  
333 public health policies to understand and better align with the specific landscape of genetic  
334 diseases in the Vietnamese population. Carrier or newborn genetic screening programs can be  
335 re-designed for cost-effectiveness and comprehensiveness. The results also help clarify and  
336 expand existing knowledge of popular inherited diseases in the local population by providing the

337 extra dimension of molecular genetic information. By demonstrating the underlying fundamental  
338 role of genetics in inherited diseases, our work also contributes to the development of genetics  
339 education, genetics counseling, and genetics screening among the local population. The  
340 identification of three inherited diseases specific to the Vietnamese population affirms the  
341 necessity of population-specific genetic studies and that larger and more comprehensive  
342 population genetic studies dedicated to the Vietnamese population are highly desired.

#### 343 **Ethics approval and consent to participate**

344 The study was approved by the institutional ethics committee of the University of Medicine and  
345 Pharmacy, Ho Chi Minh city, Vietnam. The study has followed the guidelines set by the  
346 University of Medicine and Pharmacy, Ho Chi Minh city, Vietnam, in handling human genetic  
347 data of the participants. The participants have approved and given written informed consent to  
348 the anonymous re-use of their genomic data for this study.

#### 349 **Consent for publication**

350 All authors have read and approved the manuscript for publication.

#### 351 **Availability of data and materials**

352 The G4500 variant call set is available upon reasonable request to the corresponding authors,  
353 subject to our policy of data privacy.

#### 354 **Competing interests**

355 This study was funded by Gene Solutions, Vietnam. The funder did not have any additional role  
356 in the study design, data collection and analysis, decision to publish, or preparation of the  
357 manuscript.

358 NHT, HST, HTN, LPD, NMP, KHTN, HDLN, MTTQ, TPTN, VUT, PTCN, HG and MDP are  
359 current employees of Gene Solutions, Vietnam. The other authors declare no competing  
360 interests.

#### 361 **Authors' contributions**

362 THNT, HST, LPH, THLN, NTT, THNT, VTN, BHHN, NMP, KHTN, HDLN, MTTQ, TPTN, DVT,  
363 QTTN recruited patients and performed clinical analysis.

364 HNN, TTTD, NVL, VUT, PCTN, DKT, HTN, LPD, designed experiments and analyzed data.

365 NHT, HG, MDP designed the experiments, analyzed the data and wrote the manuscript.

366 HNN supervised the project.

#### 367 **References**

- 368 1. Antonarakis, S.E. Carrier screening for recessive disorders. *Nat. Rev. Genet.* **20**, 549-561  
369 (2019).
- 370 2. Lazarin, G.A. *et al.* An empirical estimate of carrier frequencies for 400+ causal Mendelian  
371 variants: results from an ethnically diverse clinical sample of 23,453 individuals. *Genet.*  
372 *Med.* **15**, 178-186 (2013).
- 373 3. Bylstra, Y. *et al.* Population genomics in South East Asia captures unexpectedly high  
374 carrier frequency for treatable inherited disorders. *Genet. Med.* **21**, 207-212 (2019).
- 375 4. Hamosh, A. *et al.* Online Mendelian Inheritance in Man (OMIM), a knowledgebase of  
376 human genes and genetic disorders. *Nucleic Acids Res.* **33**, D514-D517 (2005).
- 377 5. Editorial. Diversity matters. *Nat. Rev. Genet.* **20**, 495 (2019).
- 378 6. Gurdasani, D., Barroso, I., Zeggini, E. & Sandhu, M.S. Genomics of disease risk in globally  
379 diverse populations. *Nat. Rev. Genet.* **20**, 520-535 (2019).
- 380 7. The 1000 Genomes Project Consortium. A global reference for human genetic variation.  
381 *Nature* **526**, 68-74 (2015).



- 382 8. Le, V.S. *et al.* A Vietnamese human genetic variation database. *Hum. Mutat.* **40**, 1664-  
383 1675 (2019).
- 384 9. Tran, N.H. *et al.* Genetic profiling of Vietnamese population from large-scale genomic  
385 analysis of non-invasive prenatal testing data. bioRxiv 868588; doi:  
386 <https://doi.org/10.1101/868588> (2020).
- 387 10. FastQC: <https://www.bioinformatics.babraham.ac.uk/projects/fastqc/>
- 388 11. Bolger, A.M., Lohse, M. & Usadel, B. Trimmomatic: A flexible trimmer for Illumina  
389 sequence data. *Bioinformatics* **30**, 2114-2120 (2014).
- 390 12. Li, H. Aligning sequence reads, clone sequences and assembly contigs with BWA-MEM.  
391 arXiv:1303.3997v2 [q-bio.GN].
- 392 13. Li, H. *et al.* The Sequence Alignment/Map format and SAMtools. *Bioinformatics* **25**, 2078-  
393 2079 (2009).
- 394 14. Quinlan, A.R. & Hall, I.M. BEDTools: a flexible suite of utilities for comparing genomic  
395 features. *Bioinformatics* **26**, 841-842 (2010).
- 396 15. Van der Auwera, G.A. *et al.* From FastQ data to high confidence variant calls: the Genome  
397 Analysis Toolkit best practices pipeline. *Curr. Protoc. Bioinformatics* **43**, 11.10.1-11.10.33  
398 (2013).
- 399 16. Sherry, S.T. *et al.* dbSNP: the NCBI database of genetic variation. *Nucleic Acids Res.* **29**,  
400 308-311 (2001).
- 401 17. Landrum, M.J. *et al.* ClinVar: public archive of relationships among sequence variation and  
402 human phenotype. *Nucleic Acids Res.* **42**, D980-D985 (2014).
- 403 18. McLaren, W. The Ensembl Variant Effect Predictor. *Genome Biol.* **17**, 122 (2016).
- 404 19. Chang, C.C. *et al.* Second-generation PLINK: rising to the challenge of larger and richer  
405 datasets. *Gigascience* **4**, 7 (2015).
- 406 20. Lek, M. *et al.* Analysis of protein-coding genetic variation in 60,706 humans. *Nature* **536**,  
407 285-291 (2016).

- 408 21. Richards, S. *et al.* Standards and guidelines for the interpretation of sequence variants: a  
409 joint consensus recommendation of the American College of Medical Genetics and  
410 Genomics and the Association for Molecular Pathology. *Genet. Med.* **17**, 405-424 (2015).  
411 22. Jeon, S. *et al.* Korean Genome Project: 1094 Korean personal genomes with clinical  
412 information. *Sci. Adv.* **6**, eaaz7835 (2020).

413

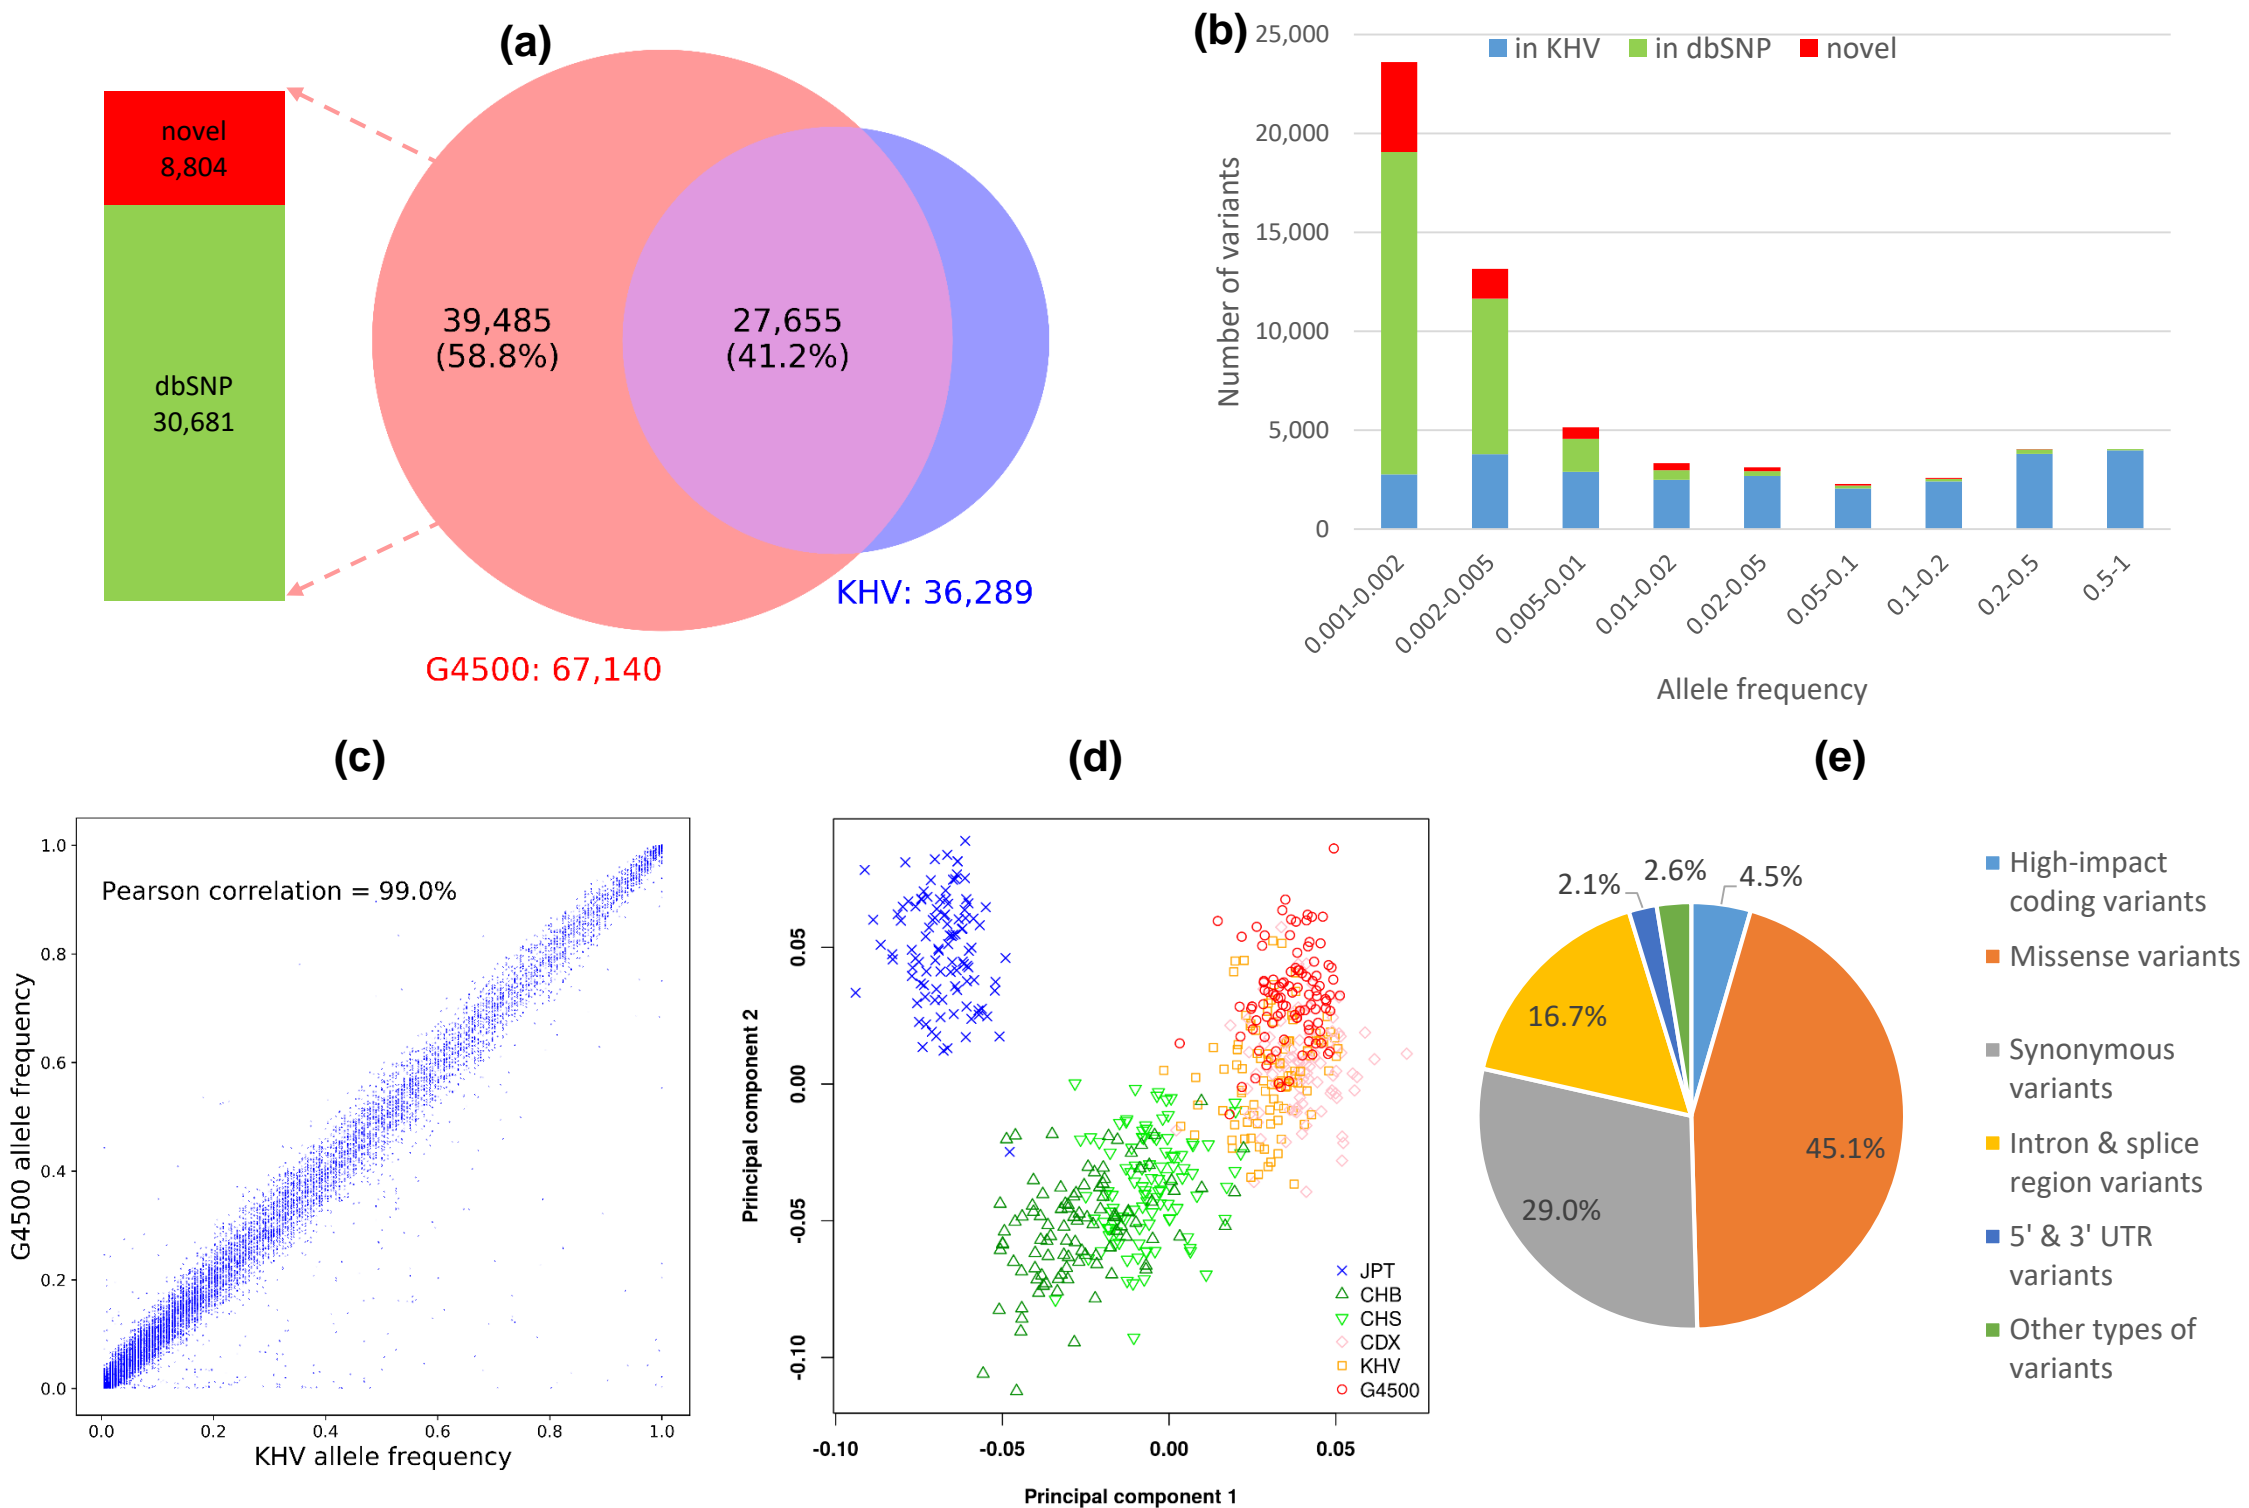

**Figure 1.** Summary of the G4500 variant call set. (a) Comparison of G4500, KHV, and dbSNP. (b) Allele frequency distribution of the G4500 call set. (c) Comparison of allele frequency between G4500 and KHV. (d) Principal component analysis of the G4500 call set and other East Asia populations (JPT: Japanese in Tokyo, Japan; CHB: Han Chinese in Beijing, China; CHS: Southern Han Chinese; CDX: Chinese Dai in Xishuangbanna, China; KHV: Kinh in Ho Chi Minh City, Vietnam). (e) Distribution of variant consequences of the G4500 call set (high-impact: stop-gained, stop-lost, start-lost, frameshift, splice receptor, and splice donor).

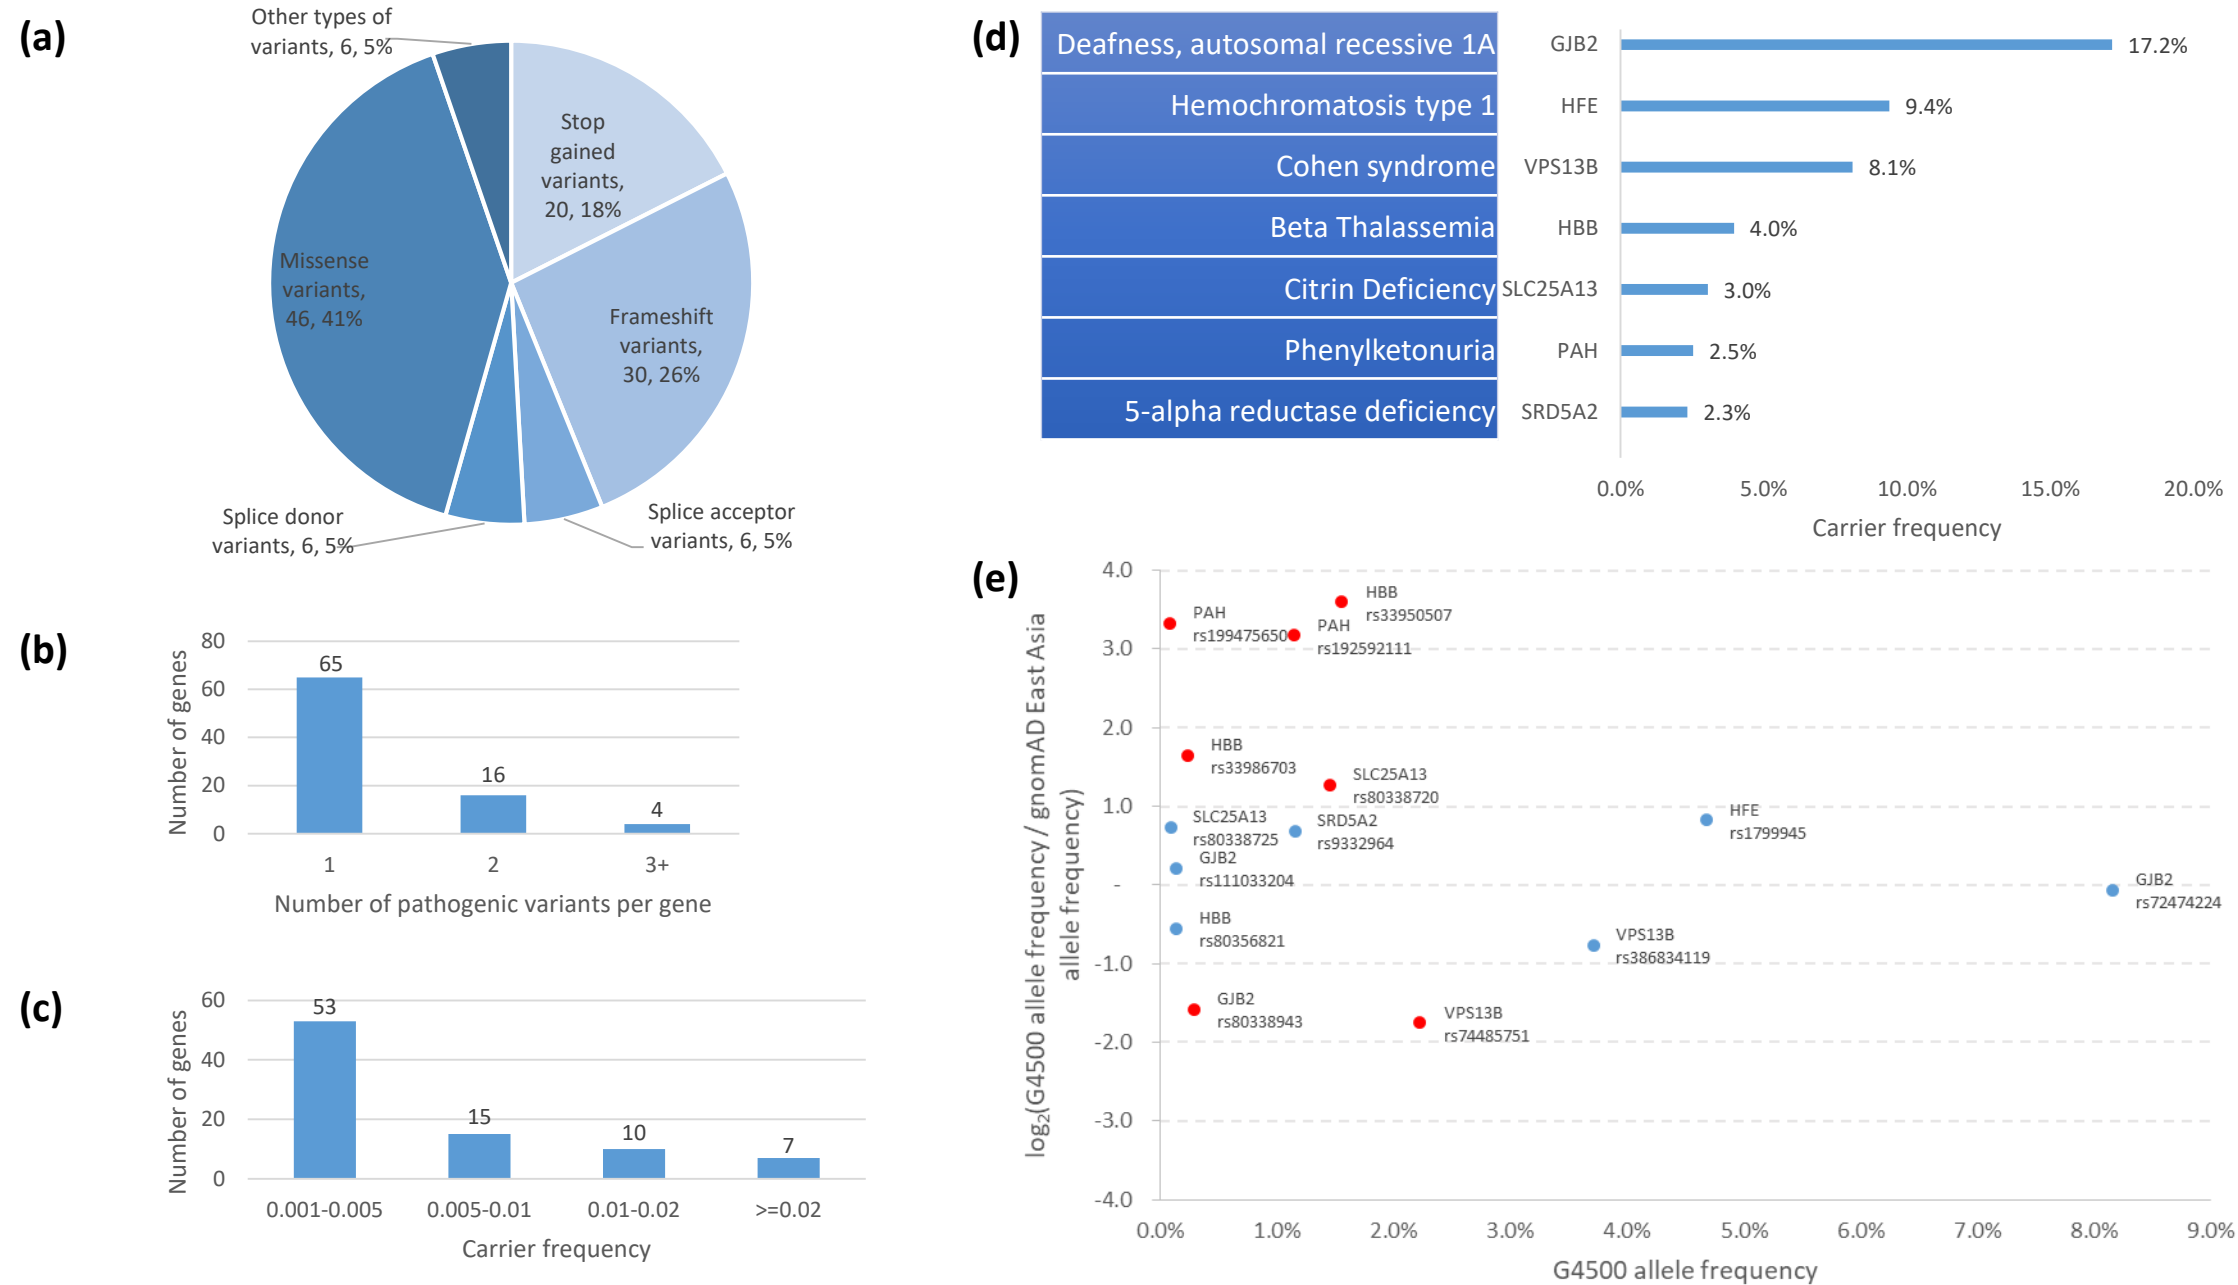

**Figure 2.** Summary of pathogenic variants, genes, and associated recessive diseases identified from the G4500 dataset. (a) Distribution of coding consequences of pathogenic variants. (b) Distribution of pathogenic variants per gene. (c) Distribution of carrier frequencies of pathogenic genes. (d) Top seven diseases-genes with carrier frequencies of more than 2%. (e) Allele frequencies of pathogenic variants of the top seven diseases-genes in the Vietnamese G4500 population (x-axis) and how they are compared to the frequencies in the East Asia population (y-axis). Some genes may have multiple variants, e.g. *GJB2* has three variants. Red points indicate variants with allele frequencies different by more than two folds between the two populations (i.e.  $\log_2$  fold change is less than -1 or greater than 1). The details of these variants are provided in Table 2.

**(a)**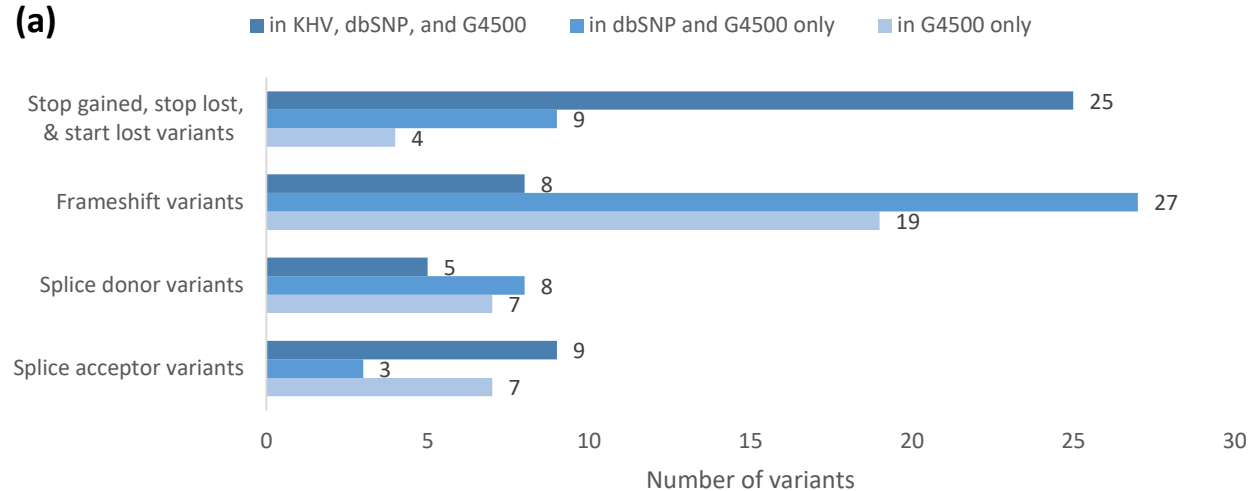**(b)**

| variant ID                      | rs ID        | G4500 AF | gnomAD EAS AF | gnomAD AF | gene   | consequence | amino acid change        | OMIM   | disease                                       |
|---------------------------------|--------------|----------|---------------|-----------|--------|-------------|--------------------------|--------|-----------------------------------------------|
| <b>in KHV, dbSNP, and G4500</b> |              |          |               |           |        |             |                          |        |                                               |
| chr6_10528925_G_A               | rs185805779  | 1.52%    | 0.17%         | 0.03%     | GCNT2  | stop gained | NP_663624.1:p.Trp5Ter    | 600429 | Cataract 13 with adult i phenotype            |
| <b>in dbSNP and G4500 only</b>  |              |          |               |           |        |             |                          |        |                                               |
| chr8_10607568_A_C               | rs777475406  | 0.61%    | 0.13%         | 0.01%     | RP1L1  | stop gained | NP_849188.4:p.Leu2177Ter | 608581 | Retinitis pigmentosa 88                       |
| chr8_10610076_GTT_G             | rs1491506199 | 0.61%    | 0.07%         | 0.10%     | RP1L1  | frameshift  | NP_849188.4:p.Glu1340fs  | 608581 | Retinitis pigmentosa 88                       |
| chr10_123041350_C_CT            | rs755014798  | 0.66%    | n.a.          | n.a.      | ACADSB | frameshift  | NP_001600.1:p.Val219fs   | 600301 | 2-methylbutyrylglucosuria                     |
| <b>in G4500 only</b>            |              |          |               |           |        |             |                          |        |                                               |
| chr8_93755784_C_A               | n.a.         | 1.22%    | n.a.          | n.a.      | TMEM67 | stop gained | NP_714915.3:p.Ser77Ter   | 609884 | Joubert syndrome 6                            |
| chr6_152293724_TAGAG_T          | n.a.         | 0.51%    | n.a.          | n.a.      | SYNE1  | frameshift  | NP_149062.2:p.Leu5887fs  | 608441 | Spinocerebellar ataxia, autosomal recessive 8 |
| chr4_78448244_A_T               | n.a.         | 0.61%    | n.a.          | n.a.      | FRAS1  | stop gained | NP_079350.5:p.Lys2068Ter | 607830 | Fraser syndrome 1                             |

**Figure 3.** (a) Distribution of variants identified from the G4500 dataset that had high-impact consequences but had not been reported in the ClinVar database. (b) Seven new pathogenic variants that we selected from (a), reviewed, and classified as “pathogenic” according to the ACMG guidelines. (AF: allele frequency; EAS: East Asia; ACMG: American College of Medical Genetics).

**Table 1.** Summary of participants (n=985)

| Types of ages            | Types of samples |                |           |                |             |           | OVERALL TOTAL |
|--------------------------|------------------|----------------|-----------|----------------|-------------|-----------|---------------|
|                          | Blood            | Amniotic fluid | Placental | Umbilical cord | Buccal swab | Others    |               |
| <b>Fetus</b>             | 0                | 180            | 13        | 8              | 0           | 0         | 201 (20.4%)   |
| <b>Child (age&lt;18)</b> | 212              | 0              | 0         | 0              | 90          | 5         | 307 (31.2%)   |
| <b>Adult (age≥18)</b>    | 435              | 0              | 0         | 0              | 29          | 13        | 477 (48.4%)   |
| OVERALL TOTAL            | 647 (65.7%)      | 180 (18.3%)    | 13 (1.3%) | 8 (0.8%)       | 119 (12.1%) | 18 (1.8%) |               |

**Table 2. Pathogenic variants of the seven most prevalent diseases-genes in the Vietnamese population.**  
(AF: allele frequency; CF: carrier frequency; EAS: East Asia)

| variant ID                                   | rs ID       | G4500 AF | gnomAD EAS AF | gnomAD AF | gene     | ClinVar ID | ClinVar disease                  |
|----------------------------------------------|-------------|----------|---------------|-----------|----------|------------|----------------------------------|
| chr13_20189473_C_T                           | rs72474224  | 8.17%    | 8.54%         | 0.35%     | GJB2     | 17023      | Deafness, autosomal recessive 1A |
| chr13_20189346_AG_A                          | rs80338943  | 0.31%    | 0.93%         | 0.02%     | GJB2     | 17014      | Deafness, autosomal recessive 1A |
| chr13_20189281_CAT_C                         | rs111033204 | 0.15%    | 0.13%         | 0.00%     | GJB2     | 44736      | Deafness, autosomal recessive 1A |
| chr6_26090951_C_G                            | rs1799945   | 4.69%    | 2.65%         | 10.13%    | HFE      | 10         | Hemochromatosis type 1           |
| chr8_99832368_G_T                            | rs386834119 | 3.72%    | 6.32%         | 4.50%     | VPS13B   | 56699      | Cohen syndrome                   |
| chr8_99832367_A_T                            | rs74485751  | 2.24%    | 7.57%         | 7.08%     | VPS13B   | 555020     | Cohen syndrome                   |
| chr11_5226943_C_T                            | rs33950507  | 1.57%    | 0.13%         | 0.03%     | HBB      | 15161      | Beta Thalassemia                 |
| chr11_5226970_T_A                            | rs33986703  | 0.25%    | 0.08%         | 0.01%     | HBB      | 15401      | Beta Thalassemia                 |
| chr11_5226762_CAAAG_C                        | rs80356821  | 0.15%    | 0.22%         | 0.01%     | HBB      | 15417      | Beta Thalassemia                 |
| chr7_96189371_TCATA_T                        | rs80338720  | 1.47%    | 0.61%         | 0.01%     | SLC25A13 | 225472     | Citrin Deficiency                |
| chr7_96121928_G_GCCCG<br>GGCAGCCACCTGTAATCTC | rs80338725  | 0.10%    | 0.06%         | 0.00%     | SLC25A13 | 6003       | Citrin Deficiency                |
| chr12_102855326_C_A                          | rs192592111 | 1.17%    | 0.13%         | 0.00%     | PAH      | 664621     | Phenylketonuria                  |
| chr12_102846924_G_T                          | rs199475650 | 0.10%    | 0.01%         | 0.00%     | PAH      | 102904     | Phenylketonuria                  |
| chr2_31529325_C_T                            | rs9332964   | 1.17%    | 0.73%         | 0.02%     | SRD5A2   | 3351       | 5-alpha reductase deficiency     |
